# Supplementary material for: Screening, diagnosis and treatment of hypertension in obese children: an international policy comparison
Source: Springer Nature journal article supplement (doi:10.1007/s40620-016-0277-6), 2016-03-03
Supplement: MOESM2 [file 19628950]

**Title:** Screening, diagnosis and treatment of hypertension in obese children: an international policy comparison

**Journal:** Journal of Nephrology

**Authors:** Aleid JG Wirix, Jelle Verheul, Jaap W Groothoff, Jeroen Nauta, Mai JM Chinapaw, Joana E Kist-van Holthe

**Address corresponding author:** Aleid Wirix: Department of Public and Occupational Health, EMGO Institute for Health and Care Research, VU University Medical Center, van der Boechorststraat 7, 1081BT Amsterdam, the Netherlands. E-mail: [a.wirix@vumc.nl](mailto:a.wirix@vumc.nl), +3120-4445931

**Supplementary Information 2.** Number of questionnaire respondents per country.

| <b>Europe</b>  | <b>136</b> | <b>Asia</b>          | <b>53</b> |
|----------------|------------|----------------------|-----------|
| UK             | 17         | Turkey               | 27        |
| France         | 16         | China                | 2         |
| Portugal       | 15         | Iran                 | 2         |
| Germany        | 11         | Sri Lanka            | 2         |
| Spain          | 10         | Bangladesh           | 1         |
| Russia         | 9          | Israel               | 1         |
| Italy          | 11         | Japan                | 1         |
| Serbia         | 8          | Jordan               | 1         |
| Poland         | 7          | Kuwait               | 1         |
| Croatia        | 6          | Myanmar              | 1         |
| Belgium        | 5          | Pakistan             | 1         |
| Greece         | 4          | Philippines          | 1         |
| Slovenia       | 4          | Saudi Arabia         | 1         |
| Latvia         | 3          | South Korea          | 1         |
| Czech Republic | 2          | Thailand             | 1         |
| Denmark        | 2          | <b>South America</b> | <b>9</b>  |
| Finland        | 2          | Argentina            | 4         |
| Netherlands    | 2          | Brazil               | 2         |
| Sweden         | 2          | Colombia             | 2         |
| Albania        | 1          | Chile                | 1         |
| Bulgaria       | 1          | <b>Oceania</b>       | <b>7</b>  |
| Georgia        | 1          | Australia            | 6         |
| Hungary        | 1          | New Zealand          | 1         |
| Lithuania      | 1          | <b>North America</b> | <b>5</b>  |
| Moldova        | 1          | United States        | 3         |
| Norway         | 1          | Canada               | 1         |
| Slovakia       | 1          | Haiti                | 1         |
| Switzerland    | 1          | <b>Africa</b>        | <b>0</b>  |
